# Supplementary material for: Phase transition and in situ construction of lateral heterostructure of 2D superconducting α/β Mo2C with sharp interface by electron beam irradiation
Source: Royal Society of Chemistry journal article supplement (doi:10.1039/c7nr01609c), 2017-01-01
Supplement: c7nr01609c1.pdf [file c7nr01609c1.pdf]

### Supplementary Information

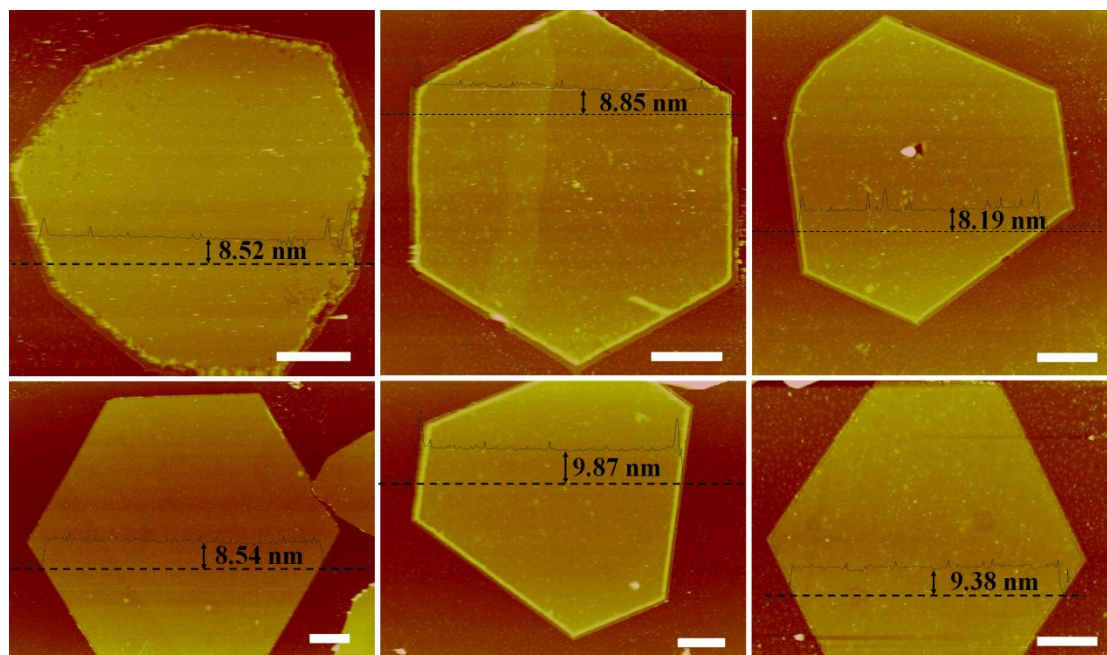

Figure S1. Typical AFM images of the 2D  $\alpha$ -Mo<sub>2</sub>C crystals used in this study, showing thickness less than 10 nm. Scale bar: 2  $\mu$ m
